# Supplementary material for: Critical appraisal of adverse effects reporting in the ‘Treatment for Adolescents With Depression Study (TADS)’
Source: PubMed Central journal article supplement — BMJ Open. 2019 Mar 15;9(3):e026089. doi: 10.1136/bmjopen-2018-026089 (PMC6429903; doi:10.1136/bmjopen-2018-026089), 2019-03-15
Supplement: bmjopen-2018-026089supp001.pdf [file bmjopen-2018-026089supp001.pdf]

**Supplementary file.** Reporting of suicidality in publications from the TADS study

| Reporting parameter |                                                  | Stage 1 (12 weeks)                                                                                                                                                                            |                                                                                                 |                       |                   | Stage 2+3 (36 weeks)                                                                                                                                                                                                                                                                                                                                                                                          |                       |                                                                                                                               | Stage 4 (88 weeks)                                                |
|---------------------|--------------------------------------------------|-----------------------------------------------------------------------------------------------------------------------------------------------------------------------------------------------|-------------------------------------------------------------------------------------------------|-----------------------|-------------------|---------------------------------------------------------------------------------------------------------------------------------------------------------------------------------------------------------------------------------------------------------------------------------------------------------------------------------------------------------------------------------------------------------------|-----------------------|-------------------------------------------------------------------------------------------------------------------------------|-------------------------------------------------------------------|
|                     |                                                  | TADS team 2004 <sup>6</sup>                                                                                                                                                                   | Emslie <sup>12</sup>                                                                            | Kennard <sup>13</sup> | May <sup>14</sup> | TADS 2007 team <sup>15</sup>                                                                                                                                                                                                                                                                                                                                                                                  | Kennard <sup>16</sup> | Vitiello <sup>17</sup>                                                                                                        | TADS team 2009 <sup>18</sup>                                      |
| CDRS-R Item 13      | % patients CDRS-R Item 13 score ≥2               | Baseline: 27%<br>12 wk: 9.4%                                                                                                                                                                  |                                                                                                 |                       |                   |                                                                                                                                                                                                                                                                                                                                                                                                               |                       |                                                                                                                               |                                                                   |
|                     | % patients CDRS-R Item 13 score ≥6               | Baseline: 2%                                                                                                                                                                                  |                                                                                                 |                       |                   |                                                                                                                                                                                                                                                                                                                                                                                                               |                       |                                                                                                                               |                                                                   |
|                     | % patients CDRS-R Item 13 score ≥3               |                                                                                                                                                                                               | Baseline: 21.4%                                                                                 |                       |                   |                                                                                                                                                                                                                                                                                                                                                                                                               |                       |                                                                                                                               |                                                                   |
|                     | % patients worsening CDRS-R Item 13 ≥1 point     |                                                                                                                                                                                               | COMB 5%<br>FLX 13.4%<br>CBT 15.2%<br>PBO 7.2%                                                   |                       |                   |                                                                                                                                                                                                                                                                                                                                                                                                               |                       |                                                                                                                               |                                                                   |
|                     | % patients increase CDRS Item 13 from 1-2 to ≥ 5 |                                                                                                                                                                                               | COMB 0<br>FLX 3.7%<br>CBT 1.3%<br>PBO 2.6%                                                      |                       |                   |                                                                                                                                                                                                                                                                                                                                                                                                               |                       |                                                                                                                               |                                                                   |
| SIQ-Jr              | % patients SIQ-Jr score ≥ 31                     | Baseline: 29%<br>12 wk: 10.3%                                                                                                                                                                 | Baseline: 29.2%                                                                                 |                       |                   | Baseline: 97/320 (30.3%)<br>COMB 42/106 (39.6%)<br><b>Stage 1 (12 wk)</b><br><b>Completed score</b><br>All: 31/278 (11.2%)<br>COMB 8/90 (8.9%)<br>FLX 18/97 (18.6%)<br>CBT 5/91 (5.5%)<br><b>Observed cases</b><br>All: 24/257 (9.3%)<br>COMB 5/84 (6.0%)<br>FLX 14/89 (15.7%)<br>CBT 5/84 (6.0%)<br><b>Stage 3 (36 wk)</b><br>All: 15/228 (6.6%)<br>COMB 2/79 (2.5%)<br>FLX 10/73 (13.7%)<br>CBT 3/76 (3.9%) |                       |                                                                                                                               | Baseline:<br>COMB 1/78 (1.3%)<br>FLX 4/73 (5.5%)<br>CBT 0/76 (0%) |
|                     | % patients SIQ-Jr score increase to ≥ 31         |                                                                                                                                                                                               | All: 4.8% (18/374)<br>COMB 2.2% (2/93)<br>FLX 7.3% (7/96)<br>CBT 2.2% (2/93)<br>PBO 7.6% (7/92) |                       |                   |                                                                                                                                                                                                                                                                                                                                                                                                               |                       | All: 6.4%<br>COMB 5.9%<br>FLX 7.6%<br>CBT 6.4%                                                                                |                                                                   |
|                     | SIQ-Jr score adjusted mean ±SD                   | Baseline:<br>COMB 27.33 (18.51)<br>FLX 21.81 (15.68)<br>CBT 21.91 (16.28)<br>PBO 24.20 (16.46)<br>12 wk:<br>COMB 11.79 (11.69)<br>FLX 14.44 (11.13)<br>CBT 11.40 (10.44)<br>PBO 15.01 (11.05) | 12 wk:<br>COMB 10.9 ± 0.3<br>FLX 13.7 ± 0.2<br>CBT 11.3 ± 0.3<br>PBO 14.5 ± 0.6                 |                       |                   |                                                                                                                                                                                                                                                                                                                                                                                                               |                       | 36 wk:<br>COMB 10.2 ± 8.8<br>FLX 12.1 ± 11.1<br>CBT 9.5 ± 9.1<br>88 wk:<br>COMB 9.3 ± 7.8<br>FLX 10.5 ± 10.4<br>CBT 8.2 ± 8.1 |                                                                   |

**Supplementary file.** Reporting of suicidality in publications from the TADS study, cont'd.

| Reporting parameter | Stage 1 (12 weeks)                                 |                                                                                                                                     |                                                                            |                   | Stage 2+3 (36 weeks)                                   |                                                                                                                                                                                                                                                                                                                                                                                                                                                           |                                                                                   | Stage 4 (88 weeks)                                                                                                                                                                    |                              |
|---------------------|----------------------------------------------------|-------------------------------------------------------------------------------------------------------------------------------------|----------------------------------------------------------------------------|-------------------|--------------------------------------------------------|-----------------------------------------------------------------------------------------------------------------------------------------------------------------------------------------------------------------------------------------------------------------------------------------------------------------------------------------------------------------------------------------------------------------------------------------------------------|-----------------------------------------------------------------------------------|---------------------------------------------------------------------------------------------------------------------------------------------------------------------------------------|------------------------------|
|                     | TADS team 2004 <sup>6</sup>                        | Emslie <sup>12</sup>                                                                                                                | Kennard <sup>13</sup>                                                      | May <sup>14</sup> | TADS team 2007 <sup>15</sup>                           |                                                                                                                                                                                                                                                                                                                                                                                                                                                           | Kennard <sup>16</sup>                                                             | Vitiello <sup>17</sup>                                                                                                                                                                | TADS team 2009 <sup>18</sup> |
| Number of cases     | Harm-related AE†                                   | All: 33/439 (7.5%)<br>Serious: 23/33 (69.7%)<br>COMB 9/107 (8.41%)<br>FLX 13/109 (11.93%)<br>CBT 5/111 (4.50%)<br>PBO 6/112 (5.36%) |                                                                            |                   |                                                        |                                                                                                                                                                                                                                                                                                                                                                                                                                                           |                                                                                   |                                                                                                                                                                                       |                              |
|                     | Suicide-related AE†                                | All: 24/439 (5.5%)<br>COMB 6/107 (5.61%)<br>FLX 9/109 (8.26%)<br>CBT 5/111 (4.50%)<br>PBO 4/112 (3.57%)                             | 24 (5.5%)<br>COMB 5 (4.7)<br>FLX 10 (9.2%)<br>CBT 5 (4.5%)<br>PBO 3 (2.7%) |                   | 16/78                                                  |                                                                                                                                                                                                                                                                                                                                                                                                                                                           |                                                                                   |                                                                                                                                                                                       |                              |
|                     | Suicidal event†                                    |                                                                                                                                     |                                                                            |                   |                                                        | <b>Stage 1 (12 wk)</b><br><b>Observed cases</b> <b>Intention-to-treat</b><br>All: 20/327 (6.1%)    All: 22/327 (6.7%)<br>COMB 5/107 (4.7%)    COMB 5/107 (4.7%)<br>FLX 10/109 (9.2%)    FLX 12/109 (11.0%)<br>CBT 5/111 (4.5%)    CBT 5/111 (4.5%)<br><b>Stage 3 (36 weeks)</b><br>All: 26/327 (8.0%)    All: 32/327 (9.8%)<br>COMB 8/107 (7.5%)    COMB 9/107 (8.4%)<br>FLX 12/109 (11.0%)    FLX 16/109 (14.7%)<br>CBT 6/111 (5.4%)    CBT 7/111 (6.3%) | <b>Stage 2-3 (12-36 wk)</b><br>PBO/Open 10.7%<br>(12/112)<br>Active 32/327 (9.8%) | All: 44/439 (10.0%)<br>SSRI at event: 36<br>COMB 9/107 (8.4%)<br>FLX 16/109 (14.7%)<br>CBT 7/111 (6.3%)<br>(5 CBT, 2 SSRI at event)<br>PBO 12/112 (10.7%)<br>(3 PBO, 9 SSRI at event) |                              |
|                     | Suicidal. inc. self-harm                           |                                                                                                                                     |                                                                            |                   | 27/78 (37.6%)                                          |                                                                                                                                                                                                                                                                                                                                                                                                                                                           |                                                                                   |                                                                                                                                                                                       |                              |
|                     | Thoughts self-harm                                 |                                                                                                                                     |                                                                            |                   | 8/27 (29.6%)                                           |                                                                                                                                                                                                                                                                                                                                                                                                                                                           |                                                                                   |                                                                                                                                                                                       |                              |
|                     | Plan self-harm                                     |                                                                                                                                     |                                                                            |                   | 8/27 (29.6%)                                           |                                                                                                                                                                                                                                                                                                                                                                                                                                                           |                                                                                   |                                                                                                                                                                                       |                              |
|                     | Intent self-harm                                   |                                                                                                                                     |                                                                            |                   | 4/27 (14.8%)                                           |                                                                                                                                                                                                                                                                                                                                                                                                                                                           |                                                                                   |                                                                                                                                                                                       |                              |
|                     | Attempt self-harm                                  |                                                                                                                                     |                                                                            |                   | All: 7/27 (25.9%)<br>COMB 1<br>FLX 4<br>CBT 1<br>PBO 1 |                                                                                                                                                                                                                                                                                                                                                                                                                                                           |                                                                                   |                                                                                                                                                                                       |                              |
|                     | Intend, plan, attempt self-harm                    |                                                                                                                                     |                                                                            |                   | All: 16<br>COMB 3<br>FLX 7<br>CBT 3<br>PBO 4           |                                                                                                                                                                                                                                                                                                                                                                                                                                                           |                                                                                   |                                                                                                                                                                                       |                              |
|                     | Intend, plan, attempt suicide (Columbia reassess.) |                                                                                                                                     |                                                                            |                   | All: 9<br>COMB 2<br>FLX 3<br>CBT 2<br>PBO 2            |                                                                                                                                                                                                                                                                                                                                                                                                                                                           |                                                                                   |                                                                                                                                                                                       |                              |

**Supplementary file.** Reporting of suicidality in publications from the TADS study, cont'd.

| Reporting parameter |                                           | Stage 1 (12 weeks)                            |                                                                                                 |                                    |                   | Stage 2+3 (36 weeks)         |                       |                                                                                                          | Stage 4 (88 weeks)           |
|---------------------|-------------------------------------------|-----------------------------------------------|-------------------------------------------------------------------------------------------------|------------------------------------|-------------------|------------------------------|-----------------------|----------------------------------------------------------------------------------------------------------|------------------------------|
|                     |                                           | TADS team 2004 <sup>6</sup>                   | Emslie <sup>12</sup>                                                                            | Kennard <sup>13</sup>              | May <sup>14</sup> | TADS team 2007 <sup>15</sup> | Kennard <sup>16</sup> | Vitiello <sup>17</sup>                                                                                   | TADS team 2009 <sup>18</sup> |
| Number of cases     | Suicidal ideation†                        |                                               | All: 18 (4.1%)<br>COMB 3 (2.8%)<br>FLX 8 (7.3%)<br>CBT 4 (3.6%)<br>PBO 3 (2.7%)                 | 6/129<br>(remitters,<br>from fig.) |                   |                              |                       | All: 23/439 (5.2%)<br>COMB 5/107 (4.7%)<br>FLX 9/109 (8.3%)<br>CBT 3/111 (2.7%)<br>PBO 6/112 (5.4%)      |                              |
|                     | Suicide-related AE,<br>Columbia 1,2,6 †   |                                               | All: 23 (5.2%)<br>COMB 5 (4.7%)<br>FLX 10 (9.2%)<br>CBT 5 (4.5%)<br>PBO 3 (2.7%)                |                                    |                   |                              |                       | All: 44/439 (10.0%)<br>COMB 9/107 (8.4%)<br>FLX 16/109 (14.7%)<br>CBT 7/111 (6.3%)<br>PBO 12/112 (10.7%) |                              |
|                     | Suicide-related AE,<br>Columbia 1,2,3,6 † |                                               | All: 24 (5.5%)<br>Serious: 15<br>COMB 6 (5.6%)<br>FLX 10 (9.2%)<br>CBT 5 (4.5%)<br>PBO 3 (2.7%) |                                    |                   |                              |                       |                                                                                                          |                              |
|                     | Attempt suicide†                          | All: 7/439 (1.6%)<br>COMB 4<br>FLX 2<br>CBT 1 | All: 5<br>COMB 2<br>FLX 2<br>CBT 1<br>PBO 0                                                     |                                    |                   |                              |                       | All: 21/439 (4.8%)<br>COMB 4/107 (3.7%)<br>FLX 7/109 (6.4%)<br>CBT 4/111 (3.6%)<br>PBO 6/112 (5.4%)      |                              |

† Frequency calculations based on ITT groups
